# Supplementary material for: A hazard model of subfreezing temperatures in the United Kingdomusing vine copulas
Source: Copernicus journal article supplement (doi:10.5194/nhess-2017-389), 2017-12-14
Supplement: Supplementary file [file nhess-2017-389-AC3-supplement.pdf]

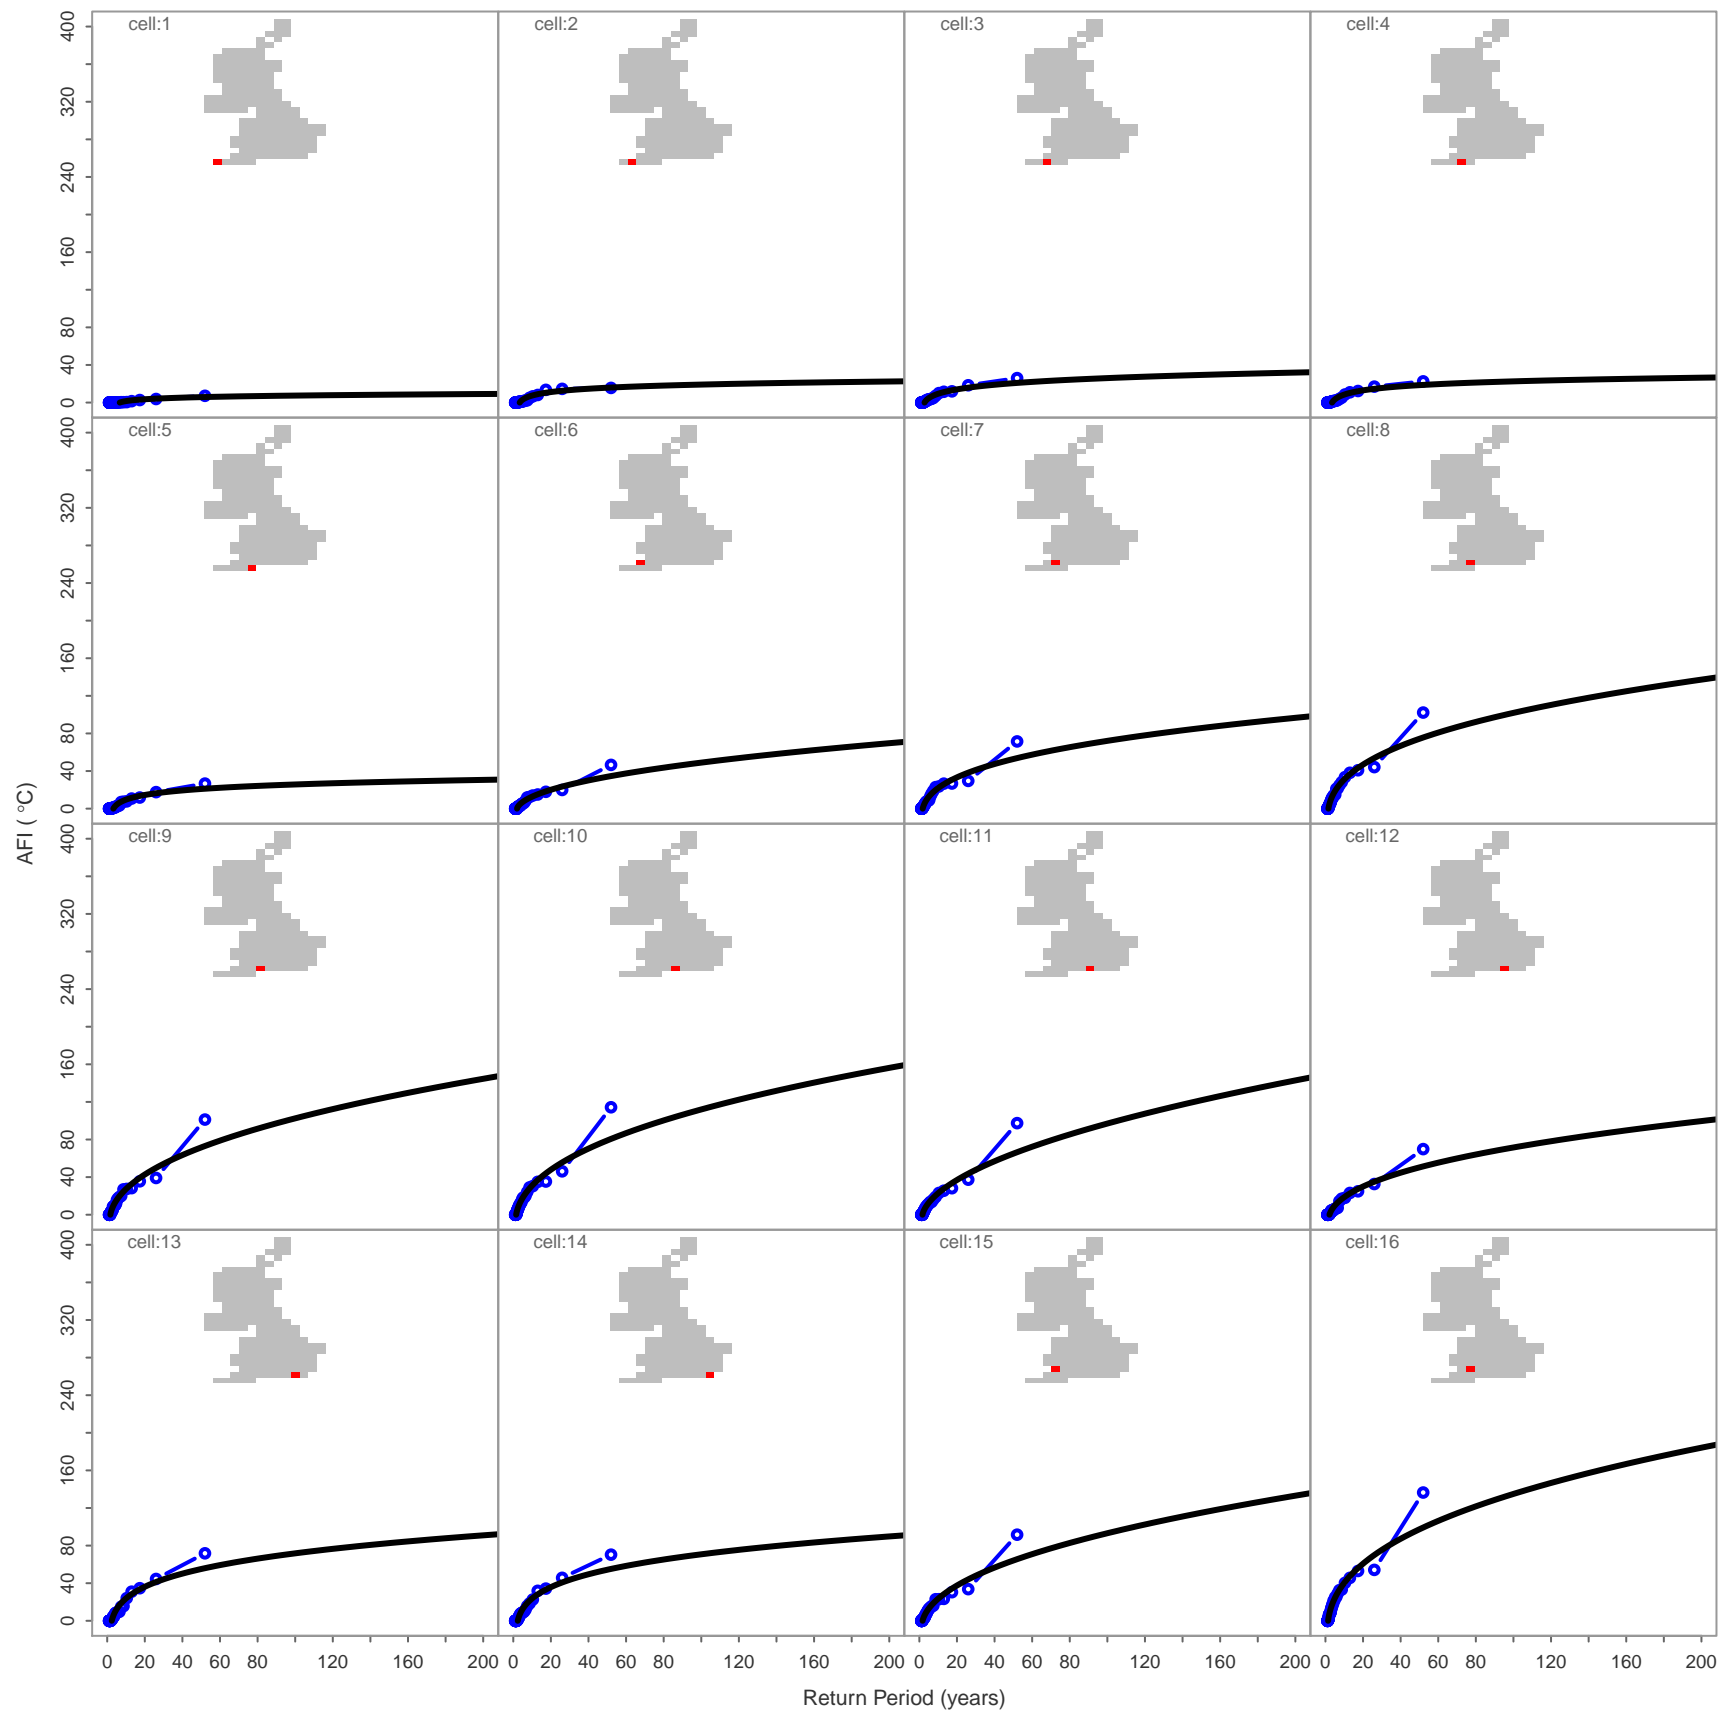

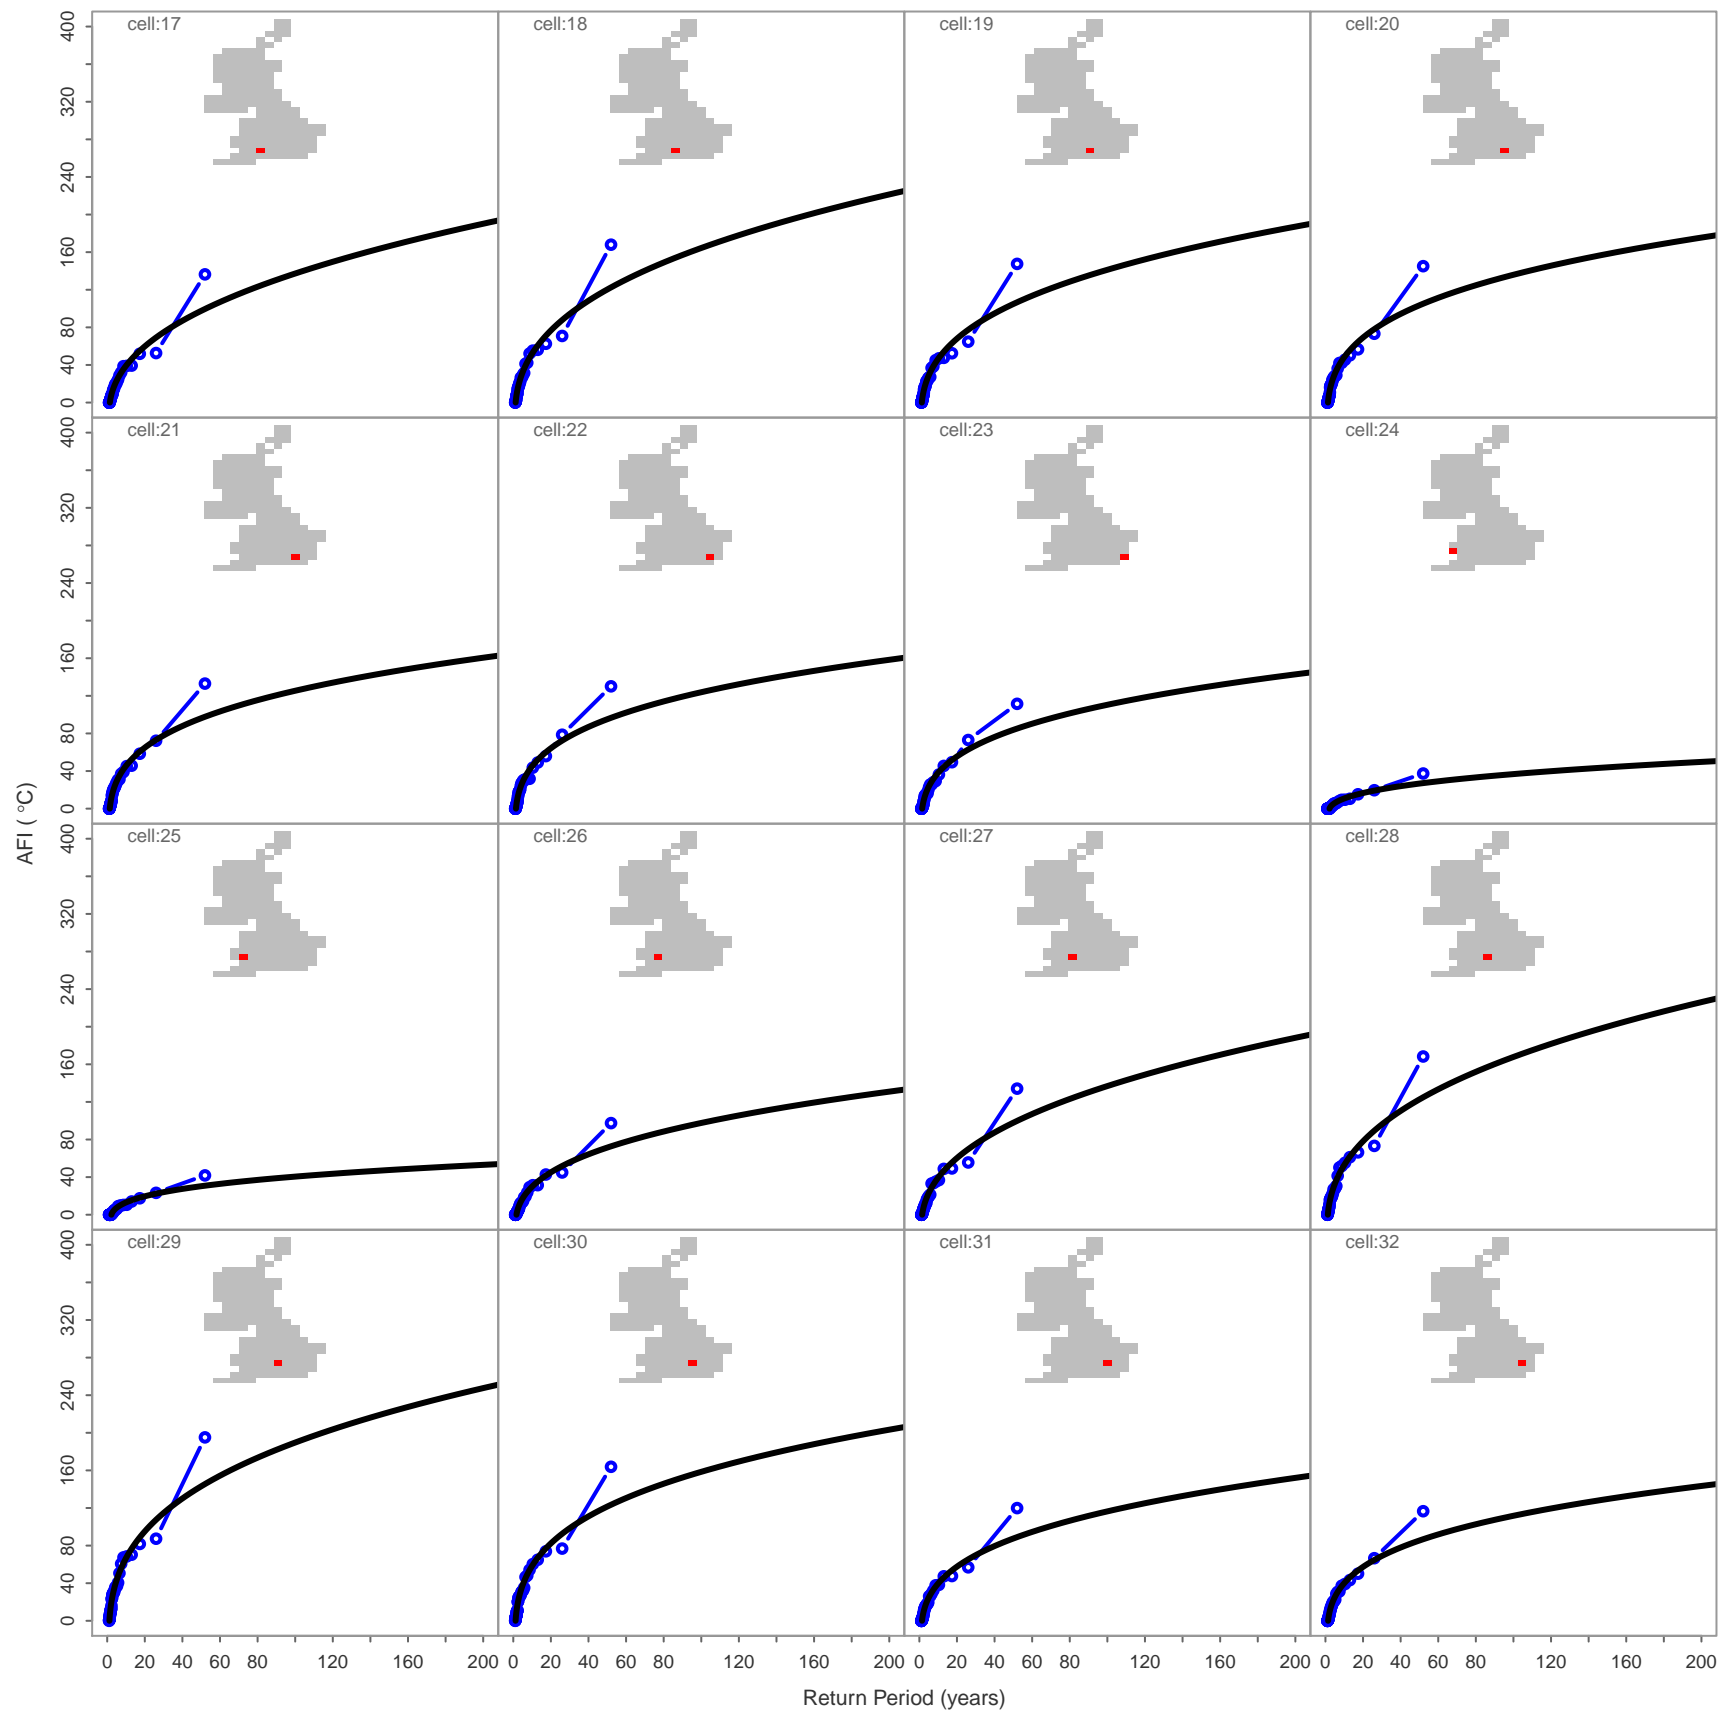

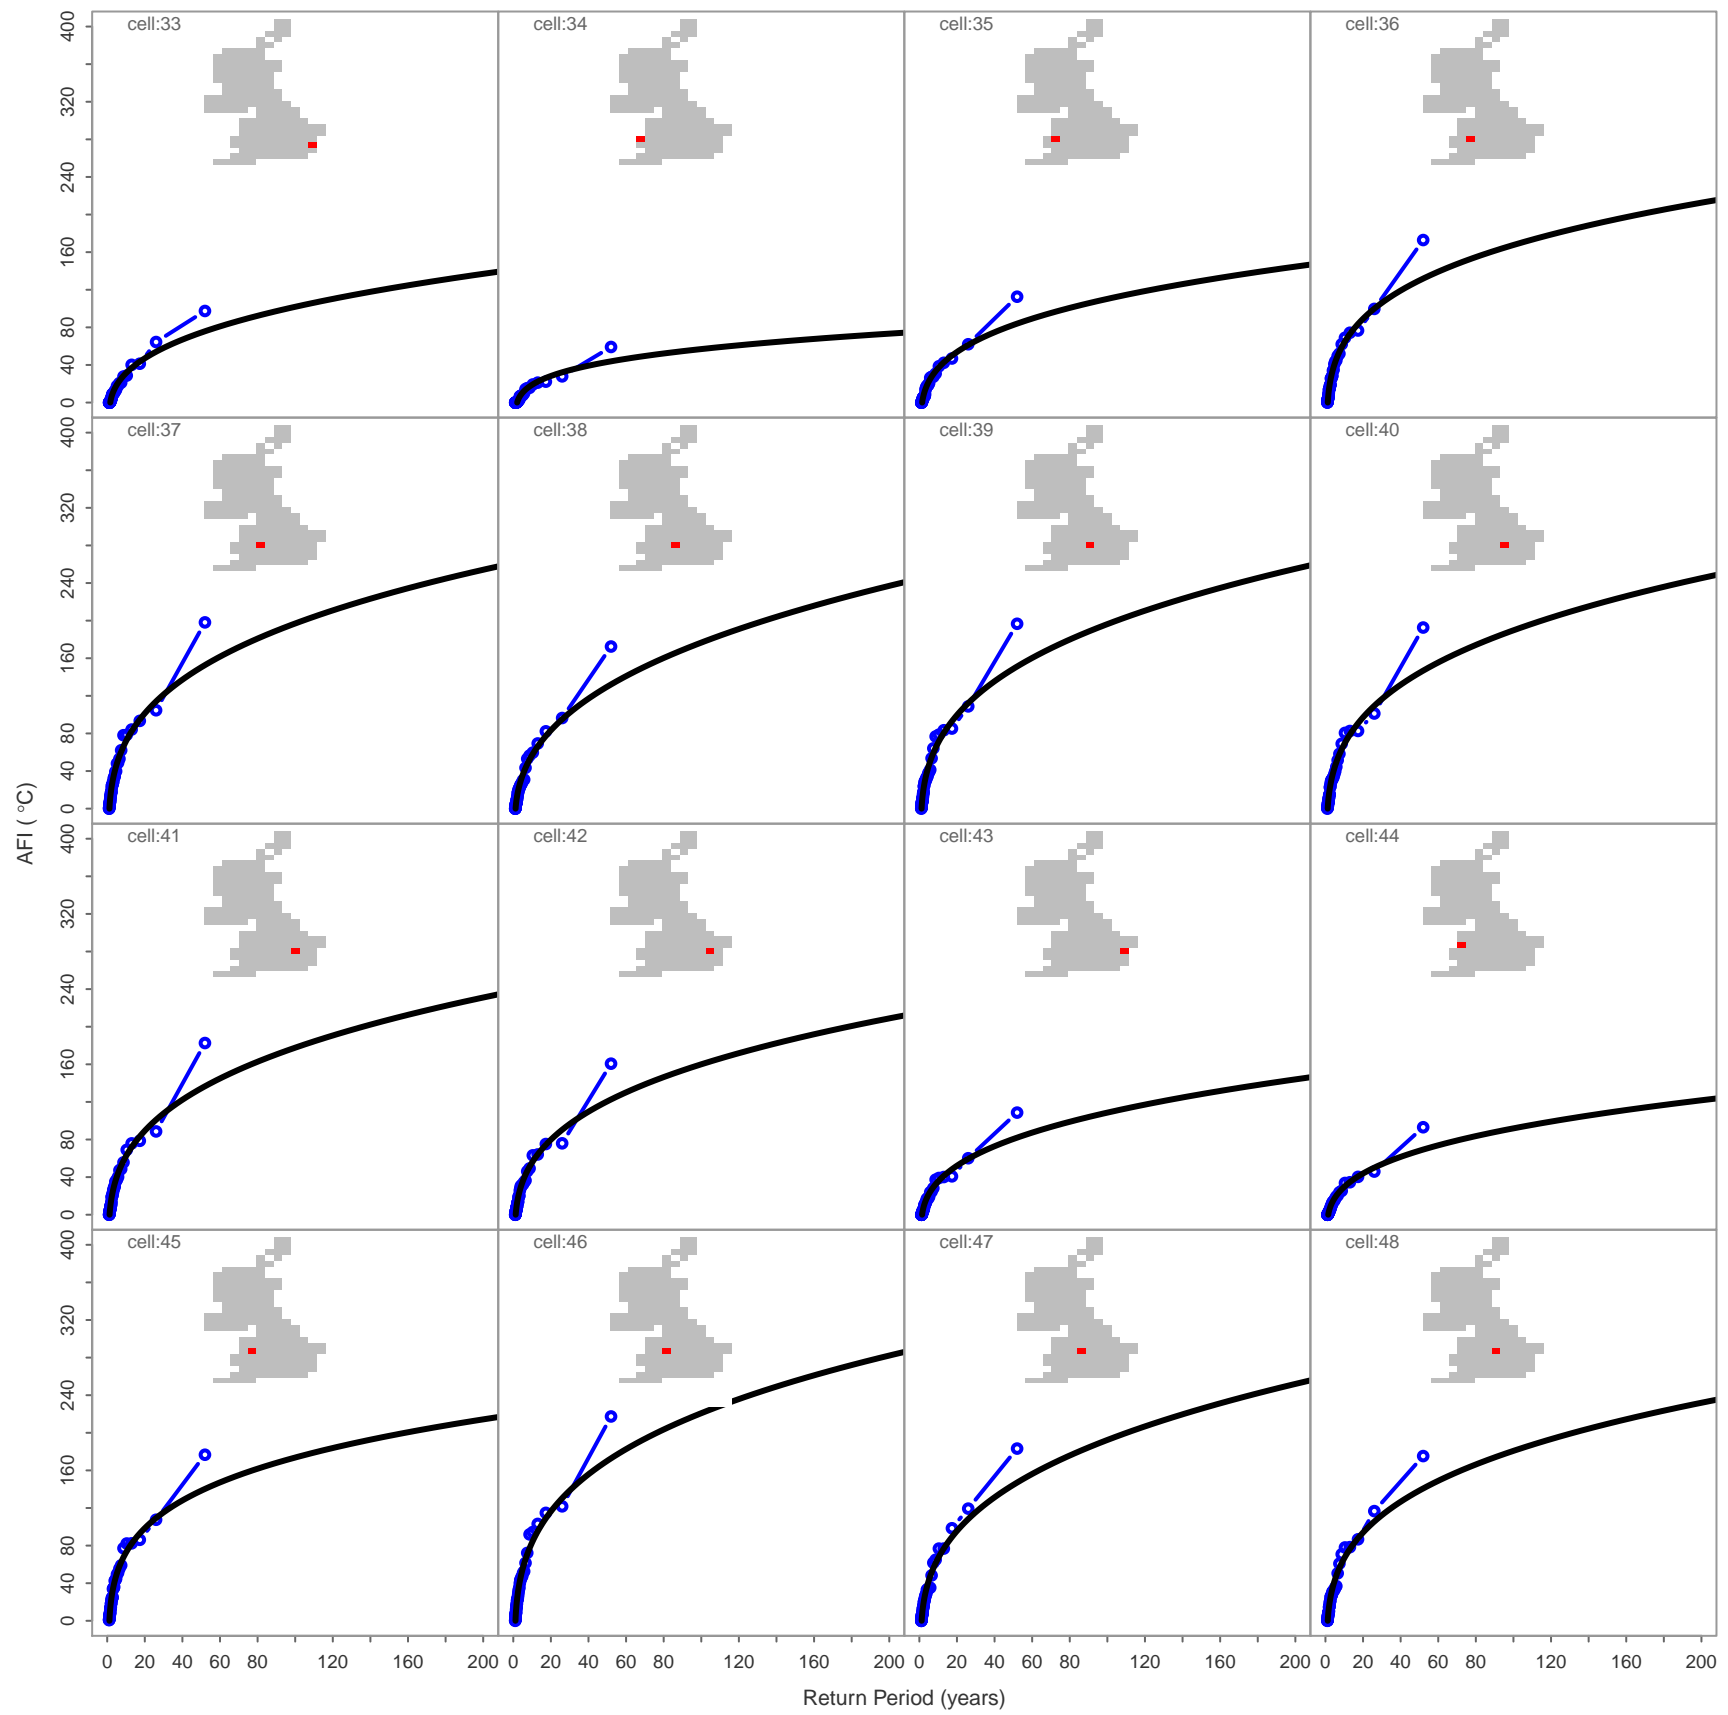

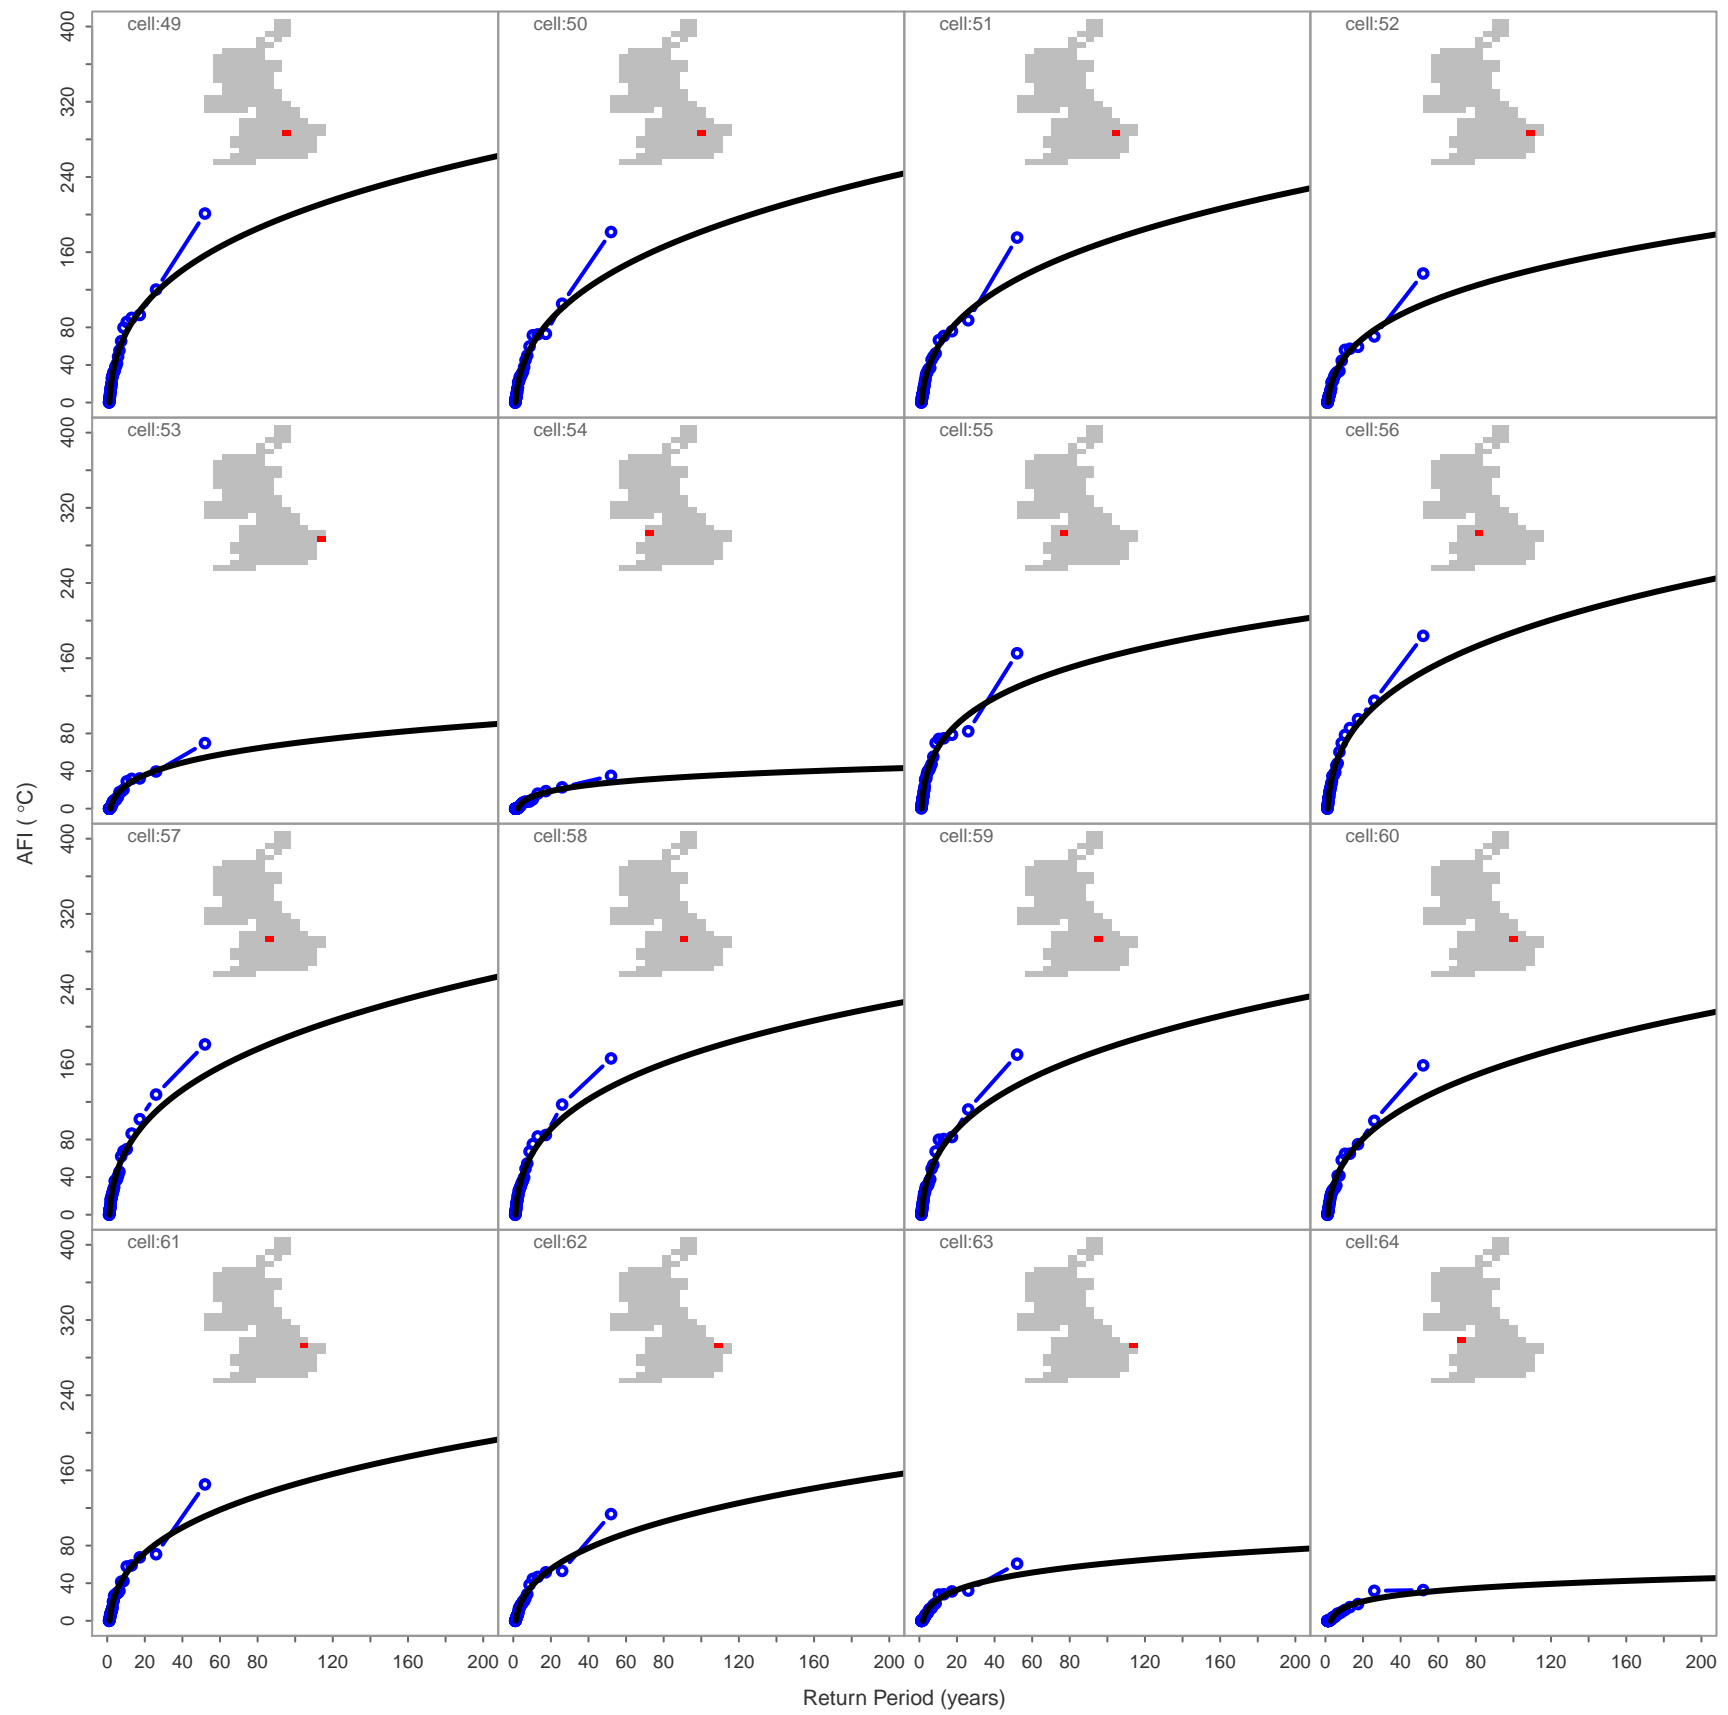

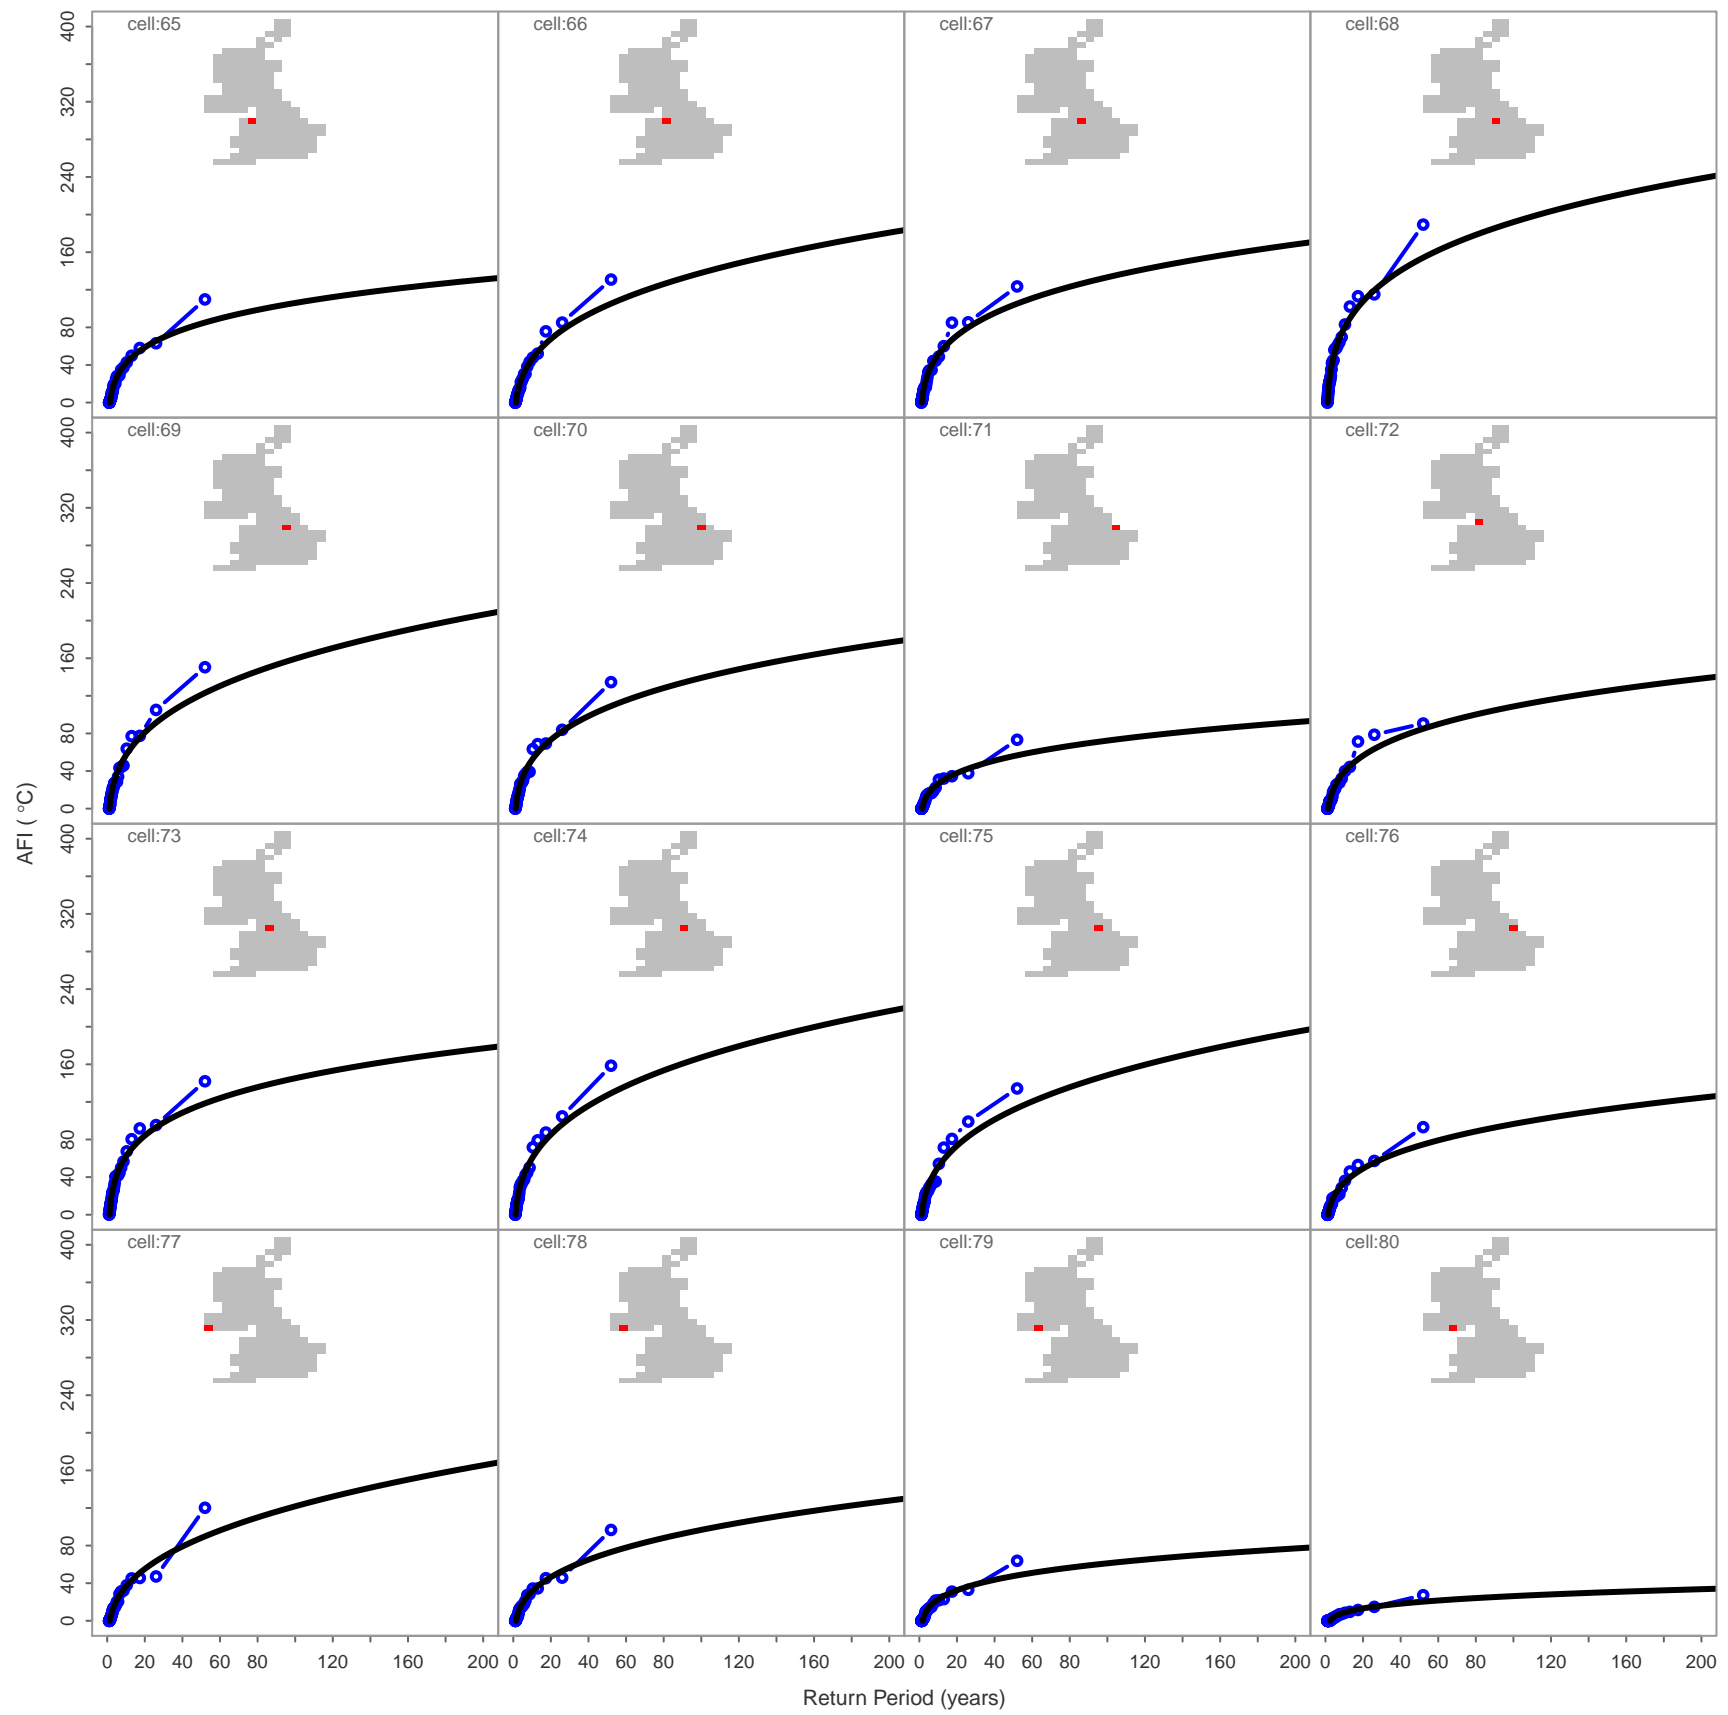

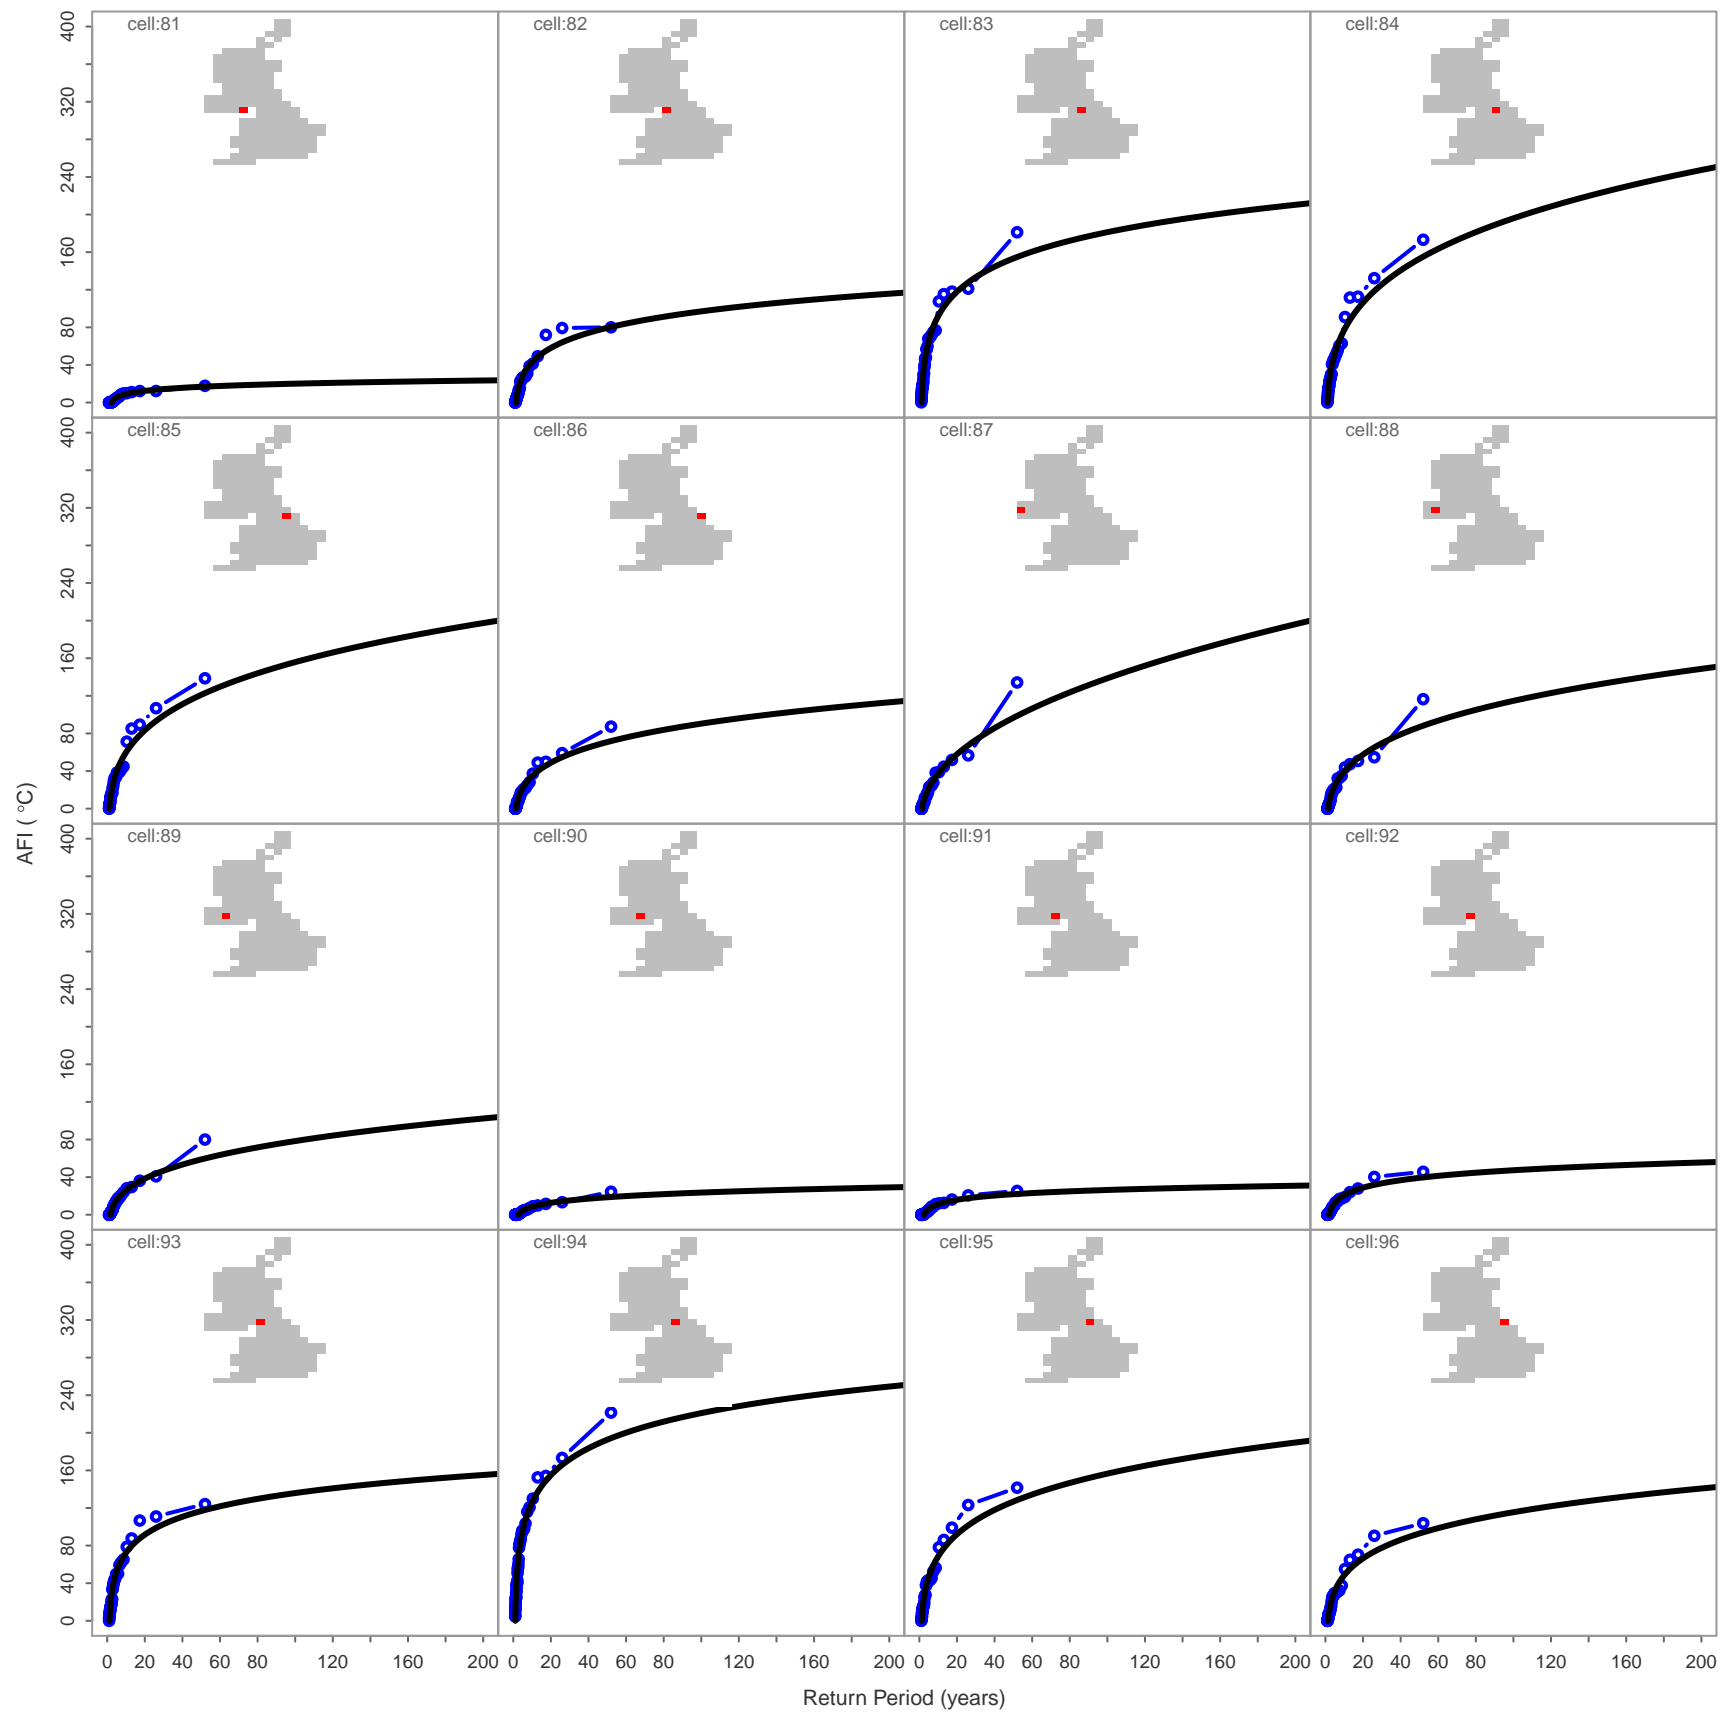

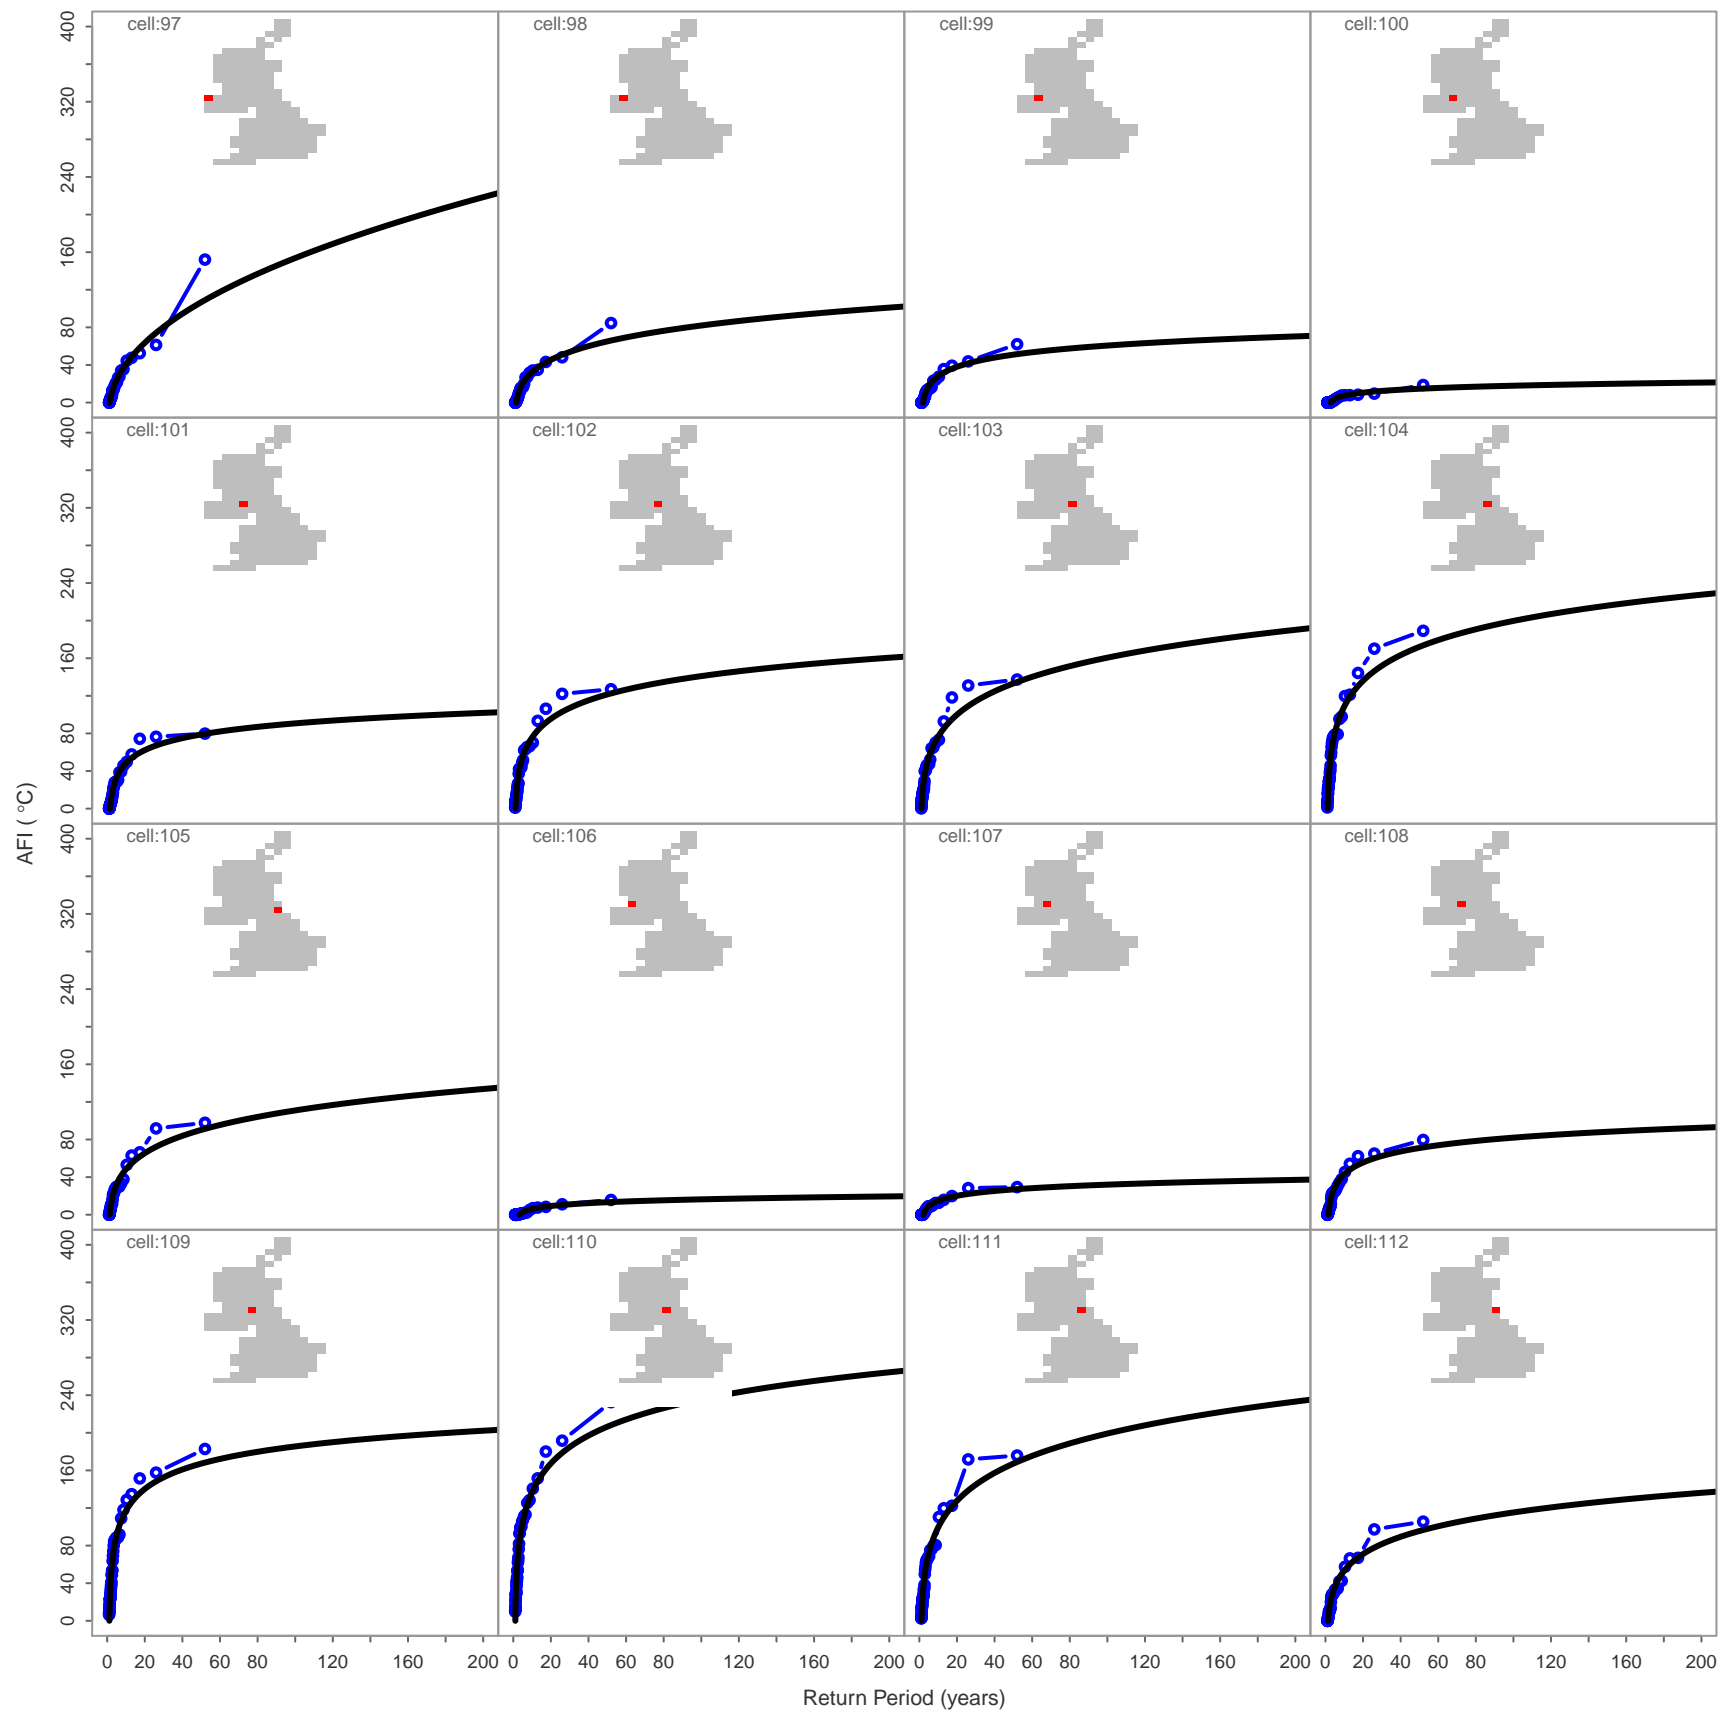

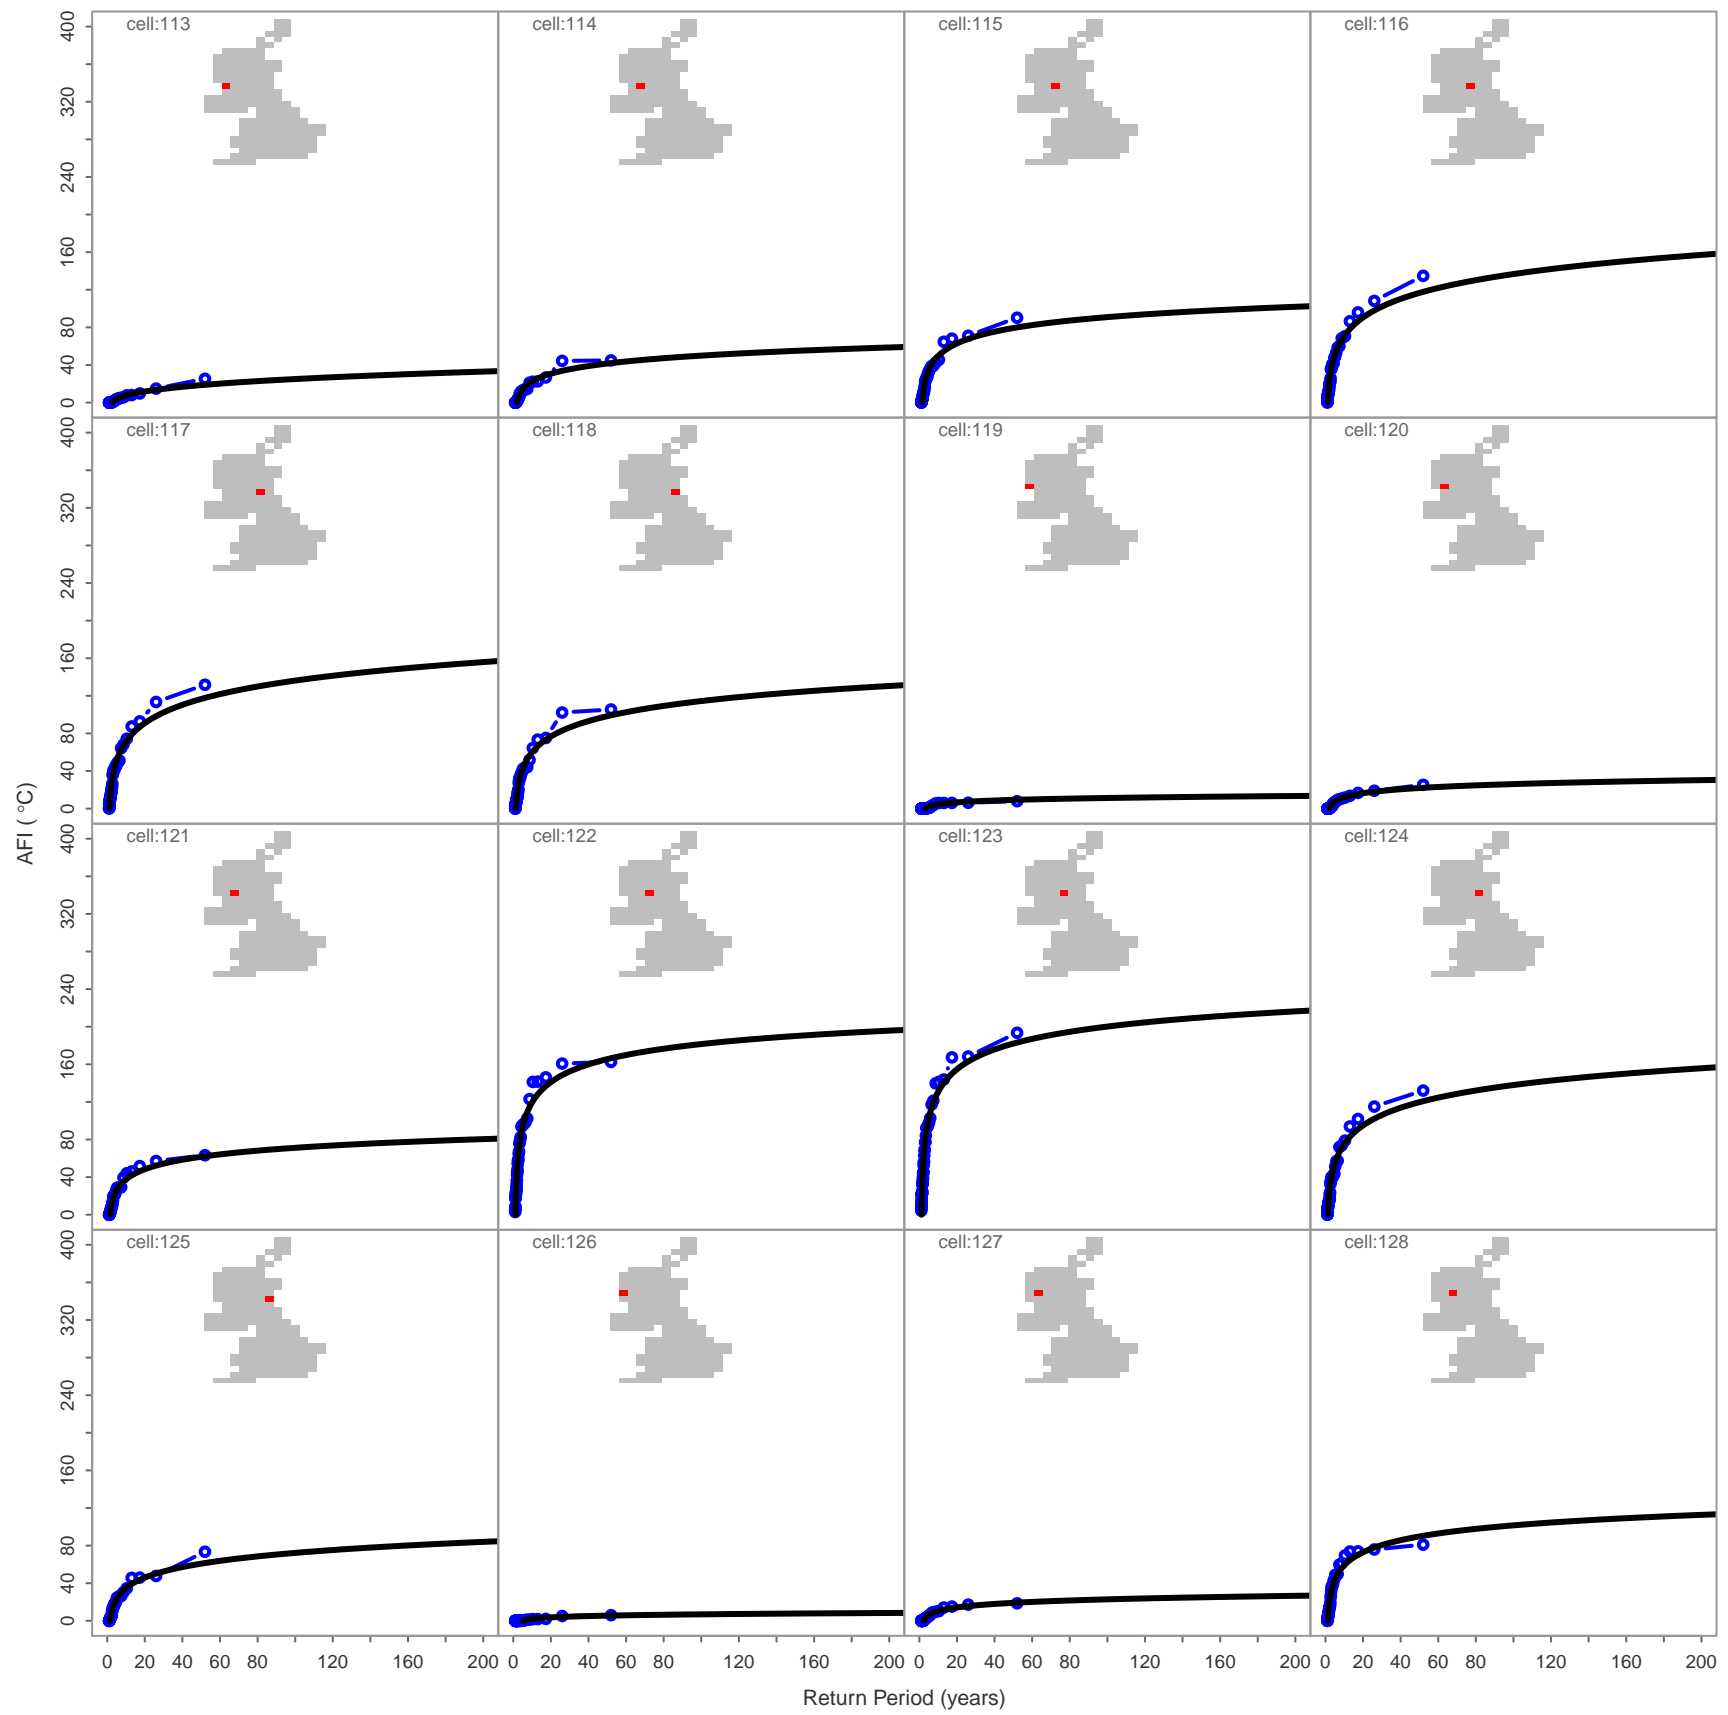



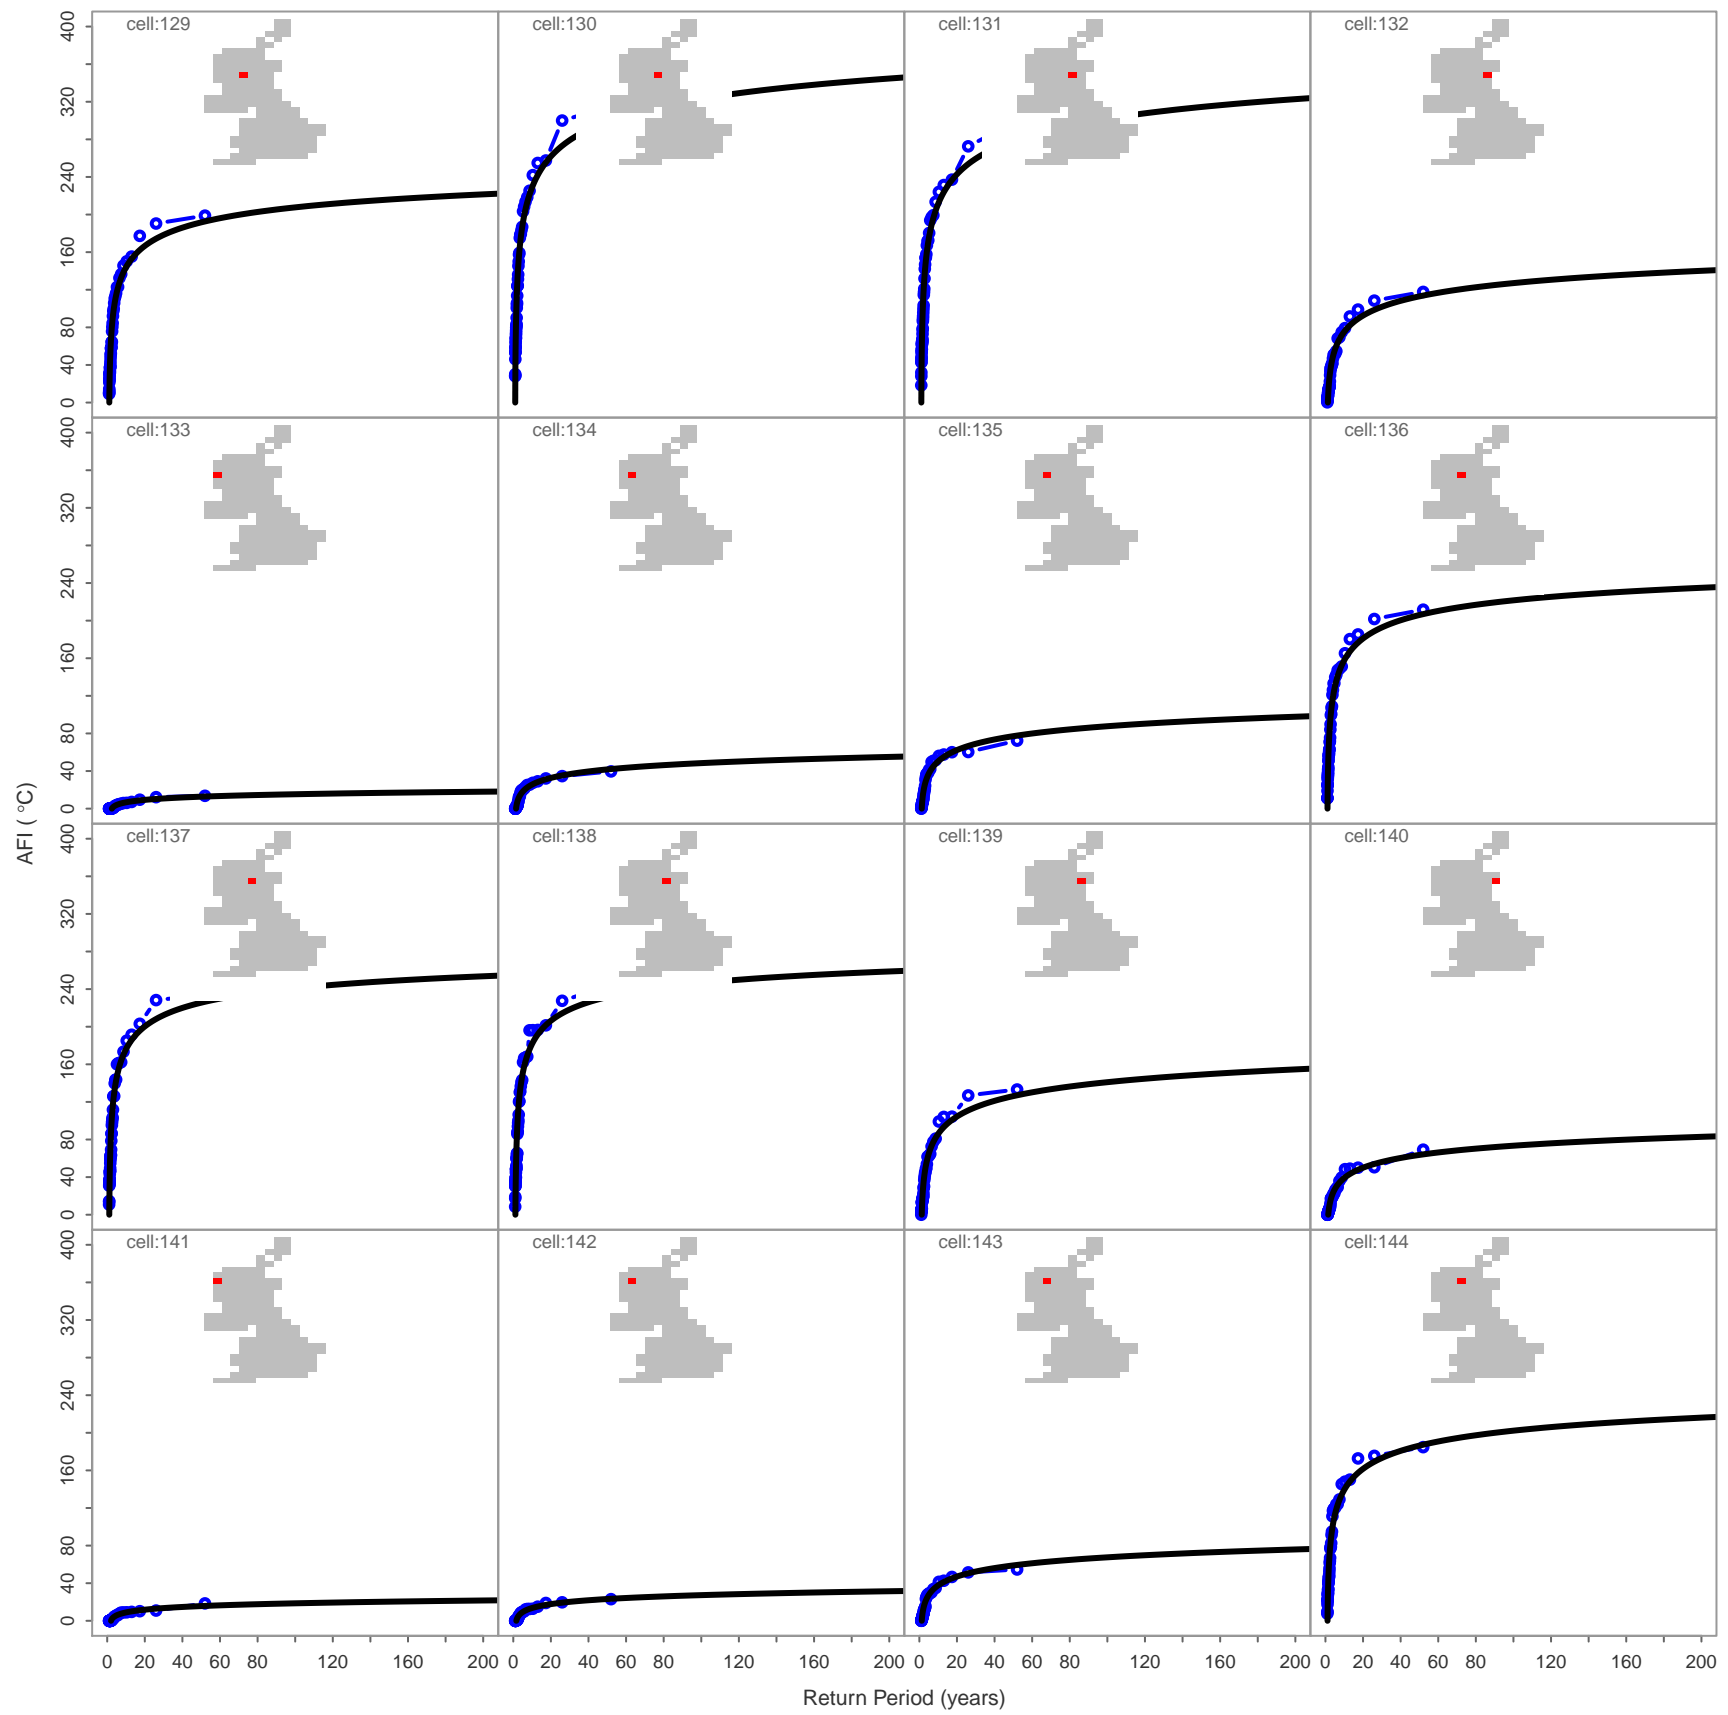

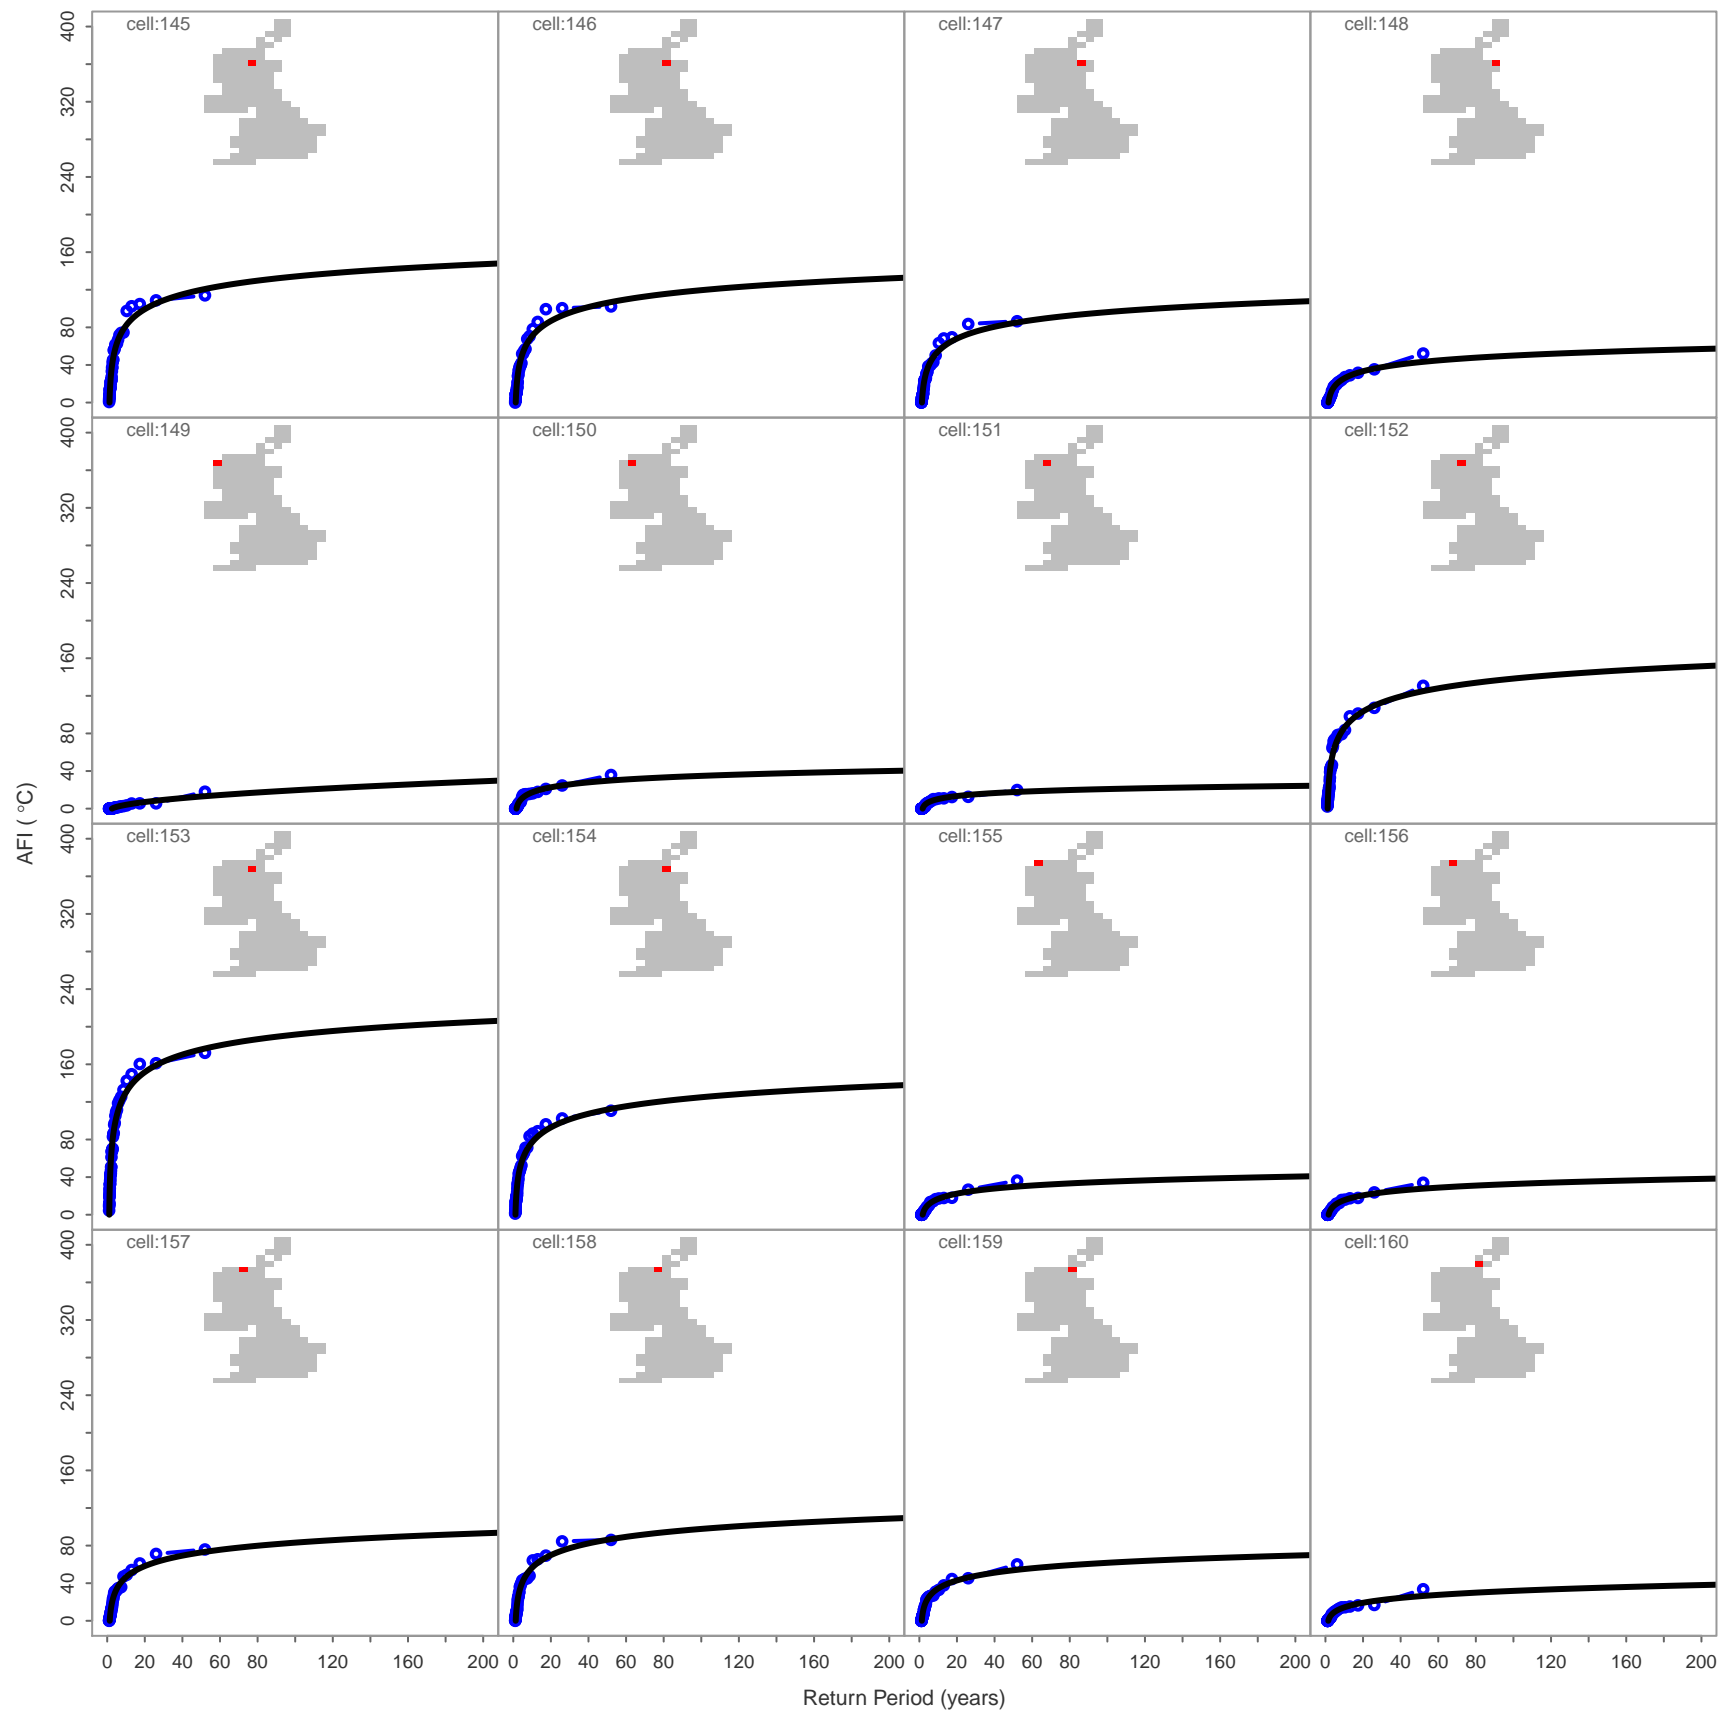

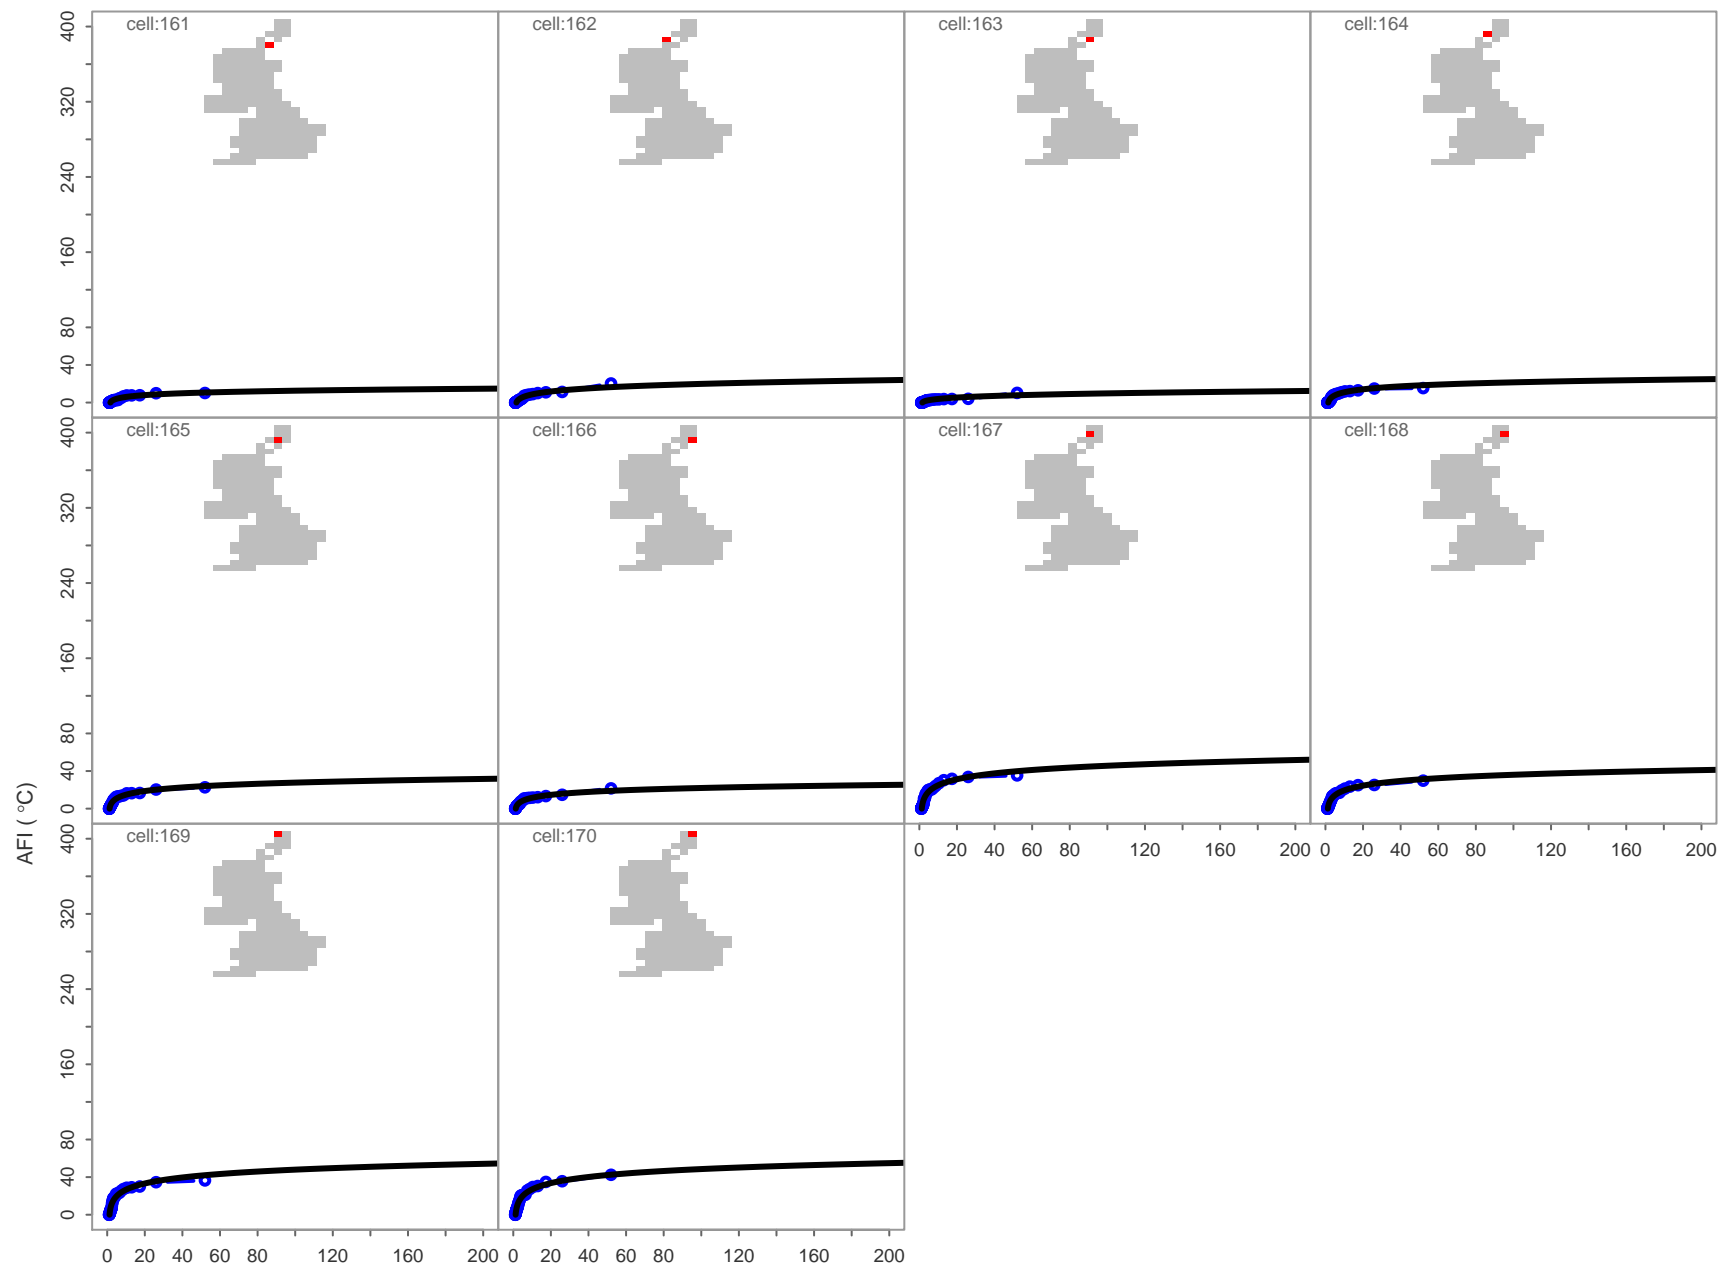

Return Period (years)
